# Supplementary material for: Effectiveness of Interventions for Managing Acute Malnutrition in Children under Five Years of Age in Low-Income and Middle-Income Countries: A Systematic Review and Meta-Analysis
Source: MDPI journal article supplement (doi:10.3390/nu12010116), 2020-01-01
Supplement: s1 [file s1]

## Appendix A: Search Strategy

PubMed Search Strategy (searched in title, abstract and/or keyword searches)

#1. "Infant"[Mesh]

#2. "Child, Preschool"[Mesh]

#3. Infant\*

#4. Toddler\*

#5. Baby OR babies

#6. Newborn\* OR Neonat\*

#7. Preschool\* OR Kindergarten\* OR Under-5s OR "Under 5s" OR "Under 5"

#8. #1 OR #2 OR #3 OR #4 OR #5 OR #6 OR #7

#9. "Severe Acute Malnutrition"[Mesh]

#10. "Infant Nutrition Disorders"[Mesh]

#11. "Nutrition Disorders"[Mesh]

#12. "Severe Acute Malnutrition" OR SAM

#13. "Moderate Acute Malnutrition" OR MAM

#14. "Protein-Energy Malnutrition"[Mesh]

#15. Undernutrition OR under-nutrition

#16. Malnourish\*

#17. Malnutrition

#18. Stunted OR wasted OR wasting OR "Wasting Syndrome"[Mesh]

#19. Starve\* OR Starvat\* OR "Starvation"[Mesh]

#20. "Vitamin A" OR "Vitamin A Deficiency" "Vitamin A"[Mesh]

#21. "Iron"[Mesh] OR "Iron deficiency" OR "Fe deficiency" OR "Anemia"[Mesh]

#22. Zinc OR "Zinc deficiency" OR "Zn deficiency" OR "Zinc"[Mesh]

#23. #9 OR #10 OR #11 OR #12 OR #13 OR #14 OR #15 OR #16 OR #17 OR #18 OR #19 OR #20 OR #21 OR #22

#24. "Food"[Mesh]

#25. "Infant Food"[Mesh]

- #26. "Food, Fortified"[Mesh]
- #27. "Food, Formulated"[Mesh]
- #28. "Dietary Supplements"[Mesh]
- #29. "Fortified Food\*"
- #30. "Diet\* Supplement\*"
- #31. "Ready to use therapeutic food" OR RUTF
- #32. "Ready to use supplementary food" OR RUSF
- #33. "Ready to use food\*" OR RUF
- #34. F100 OR F75
- #35. CTC
- #36. "Vitamin A Supplement\*"
- #37. "Micronutrient\* Supplement\*"
- #38. "Dietary Fats"[Mesh]
- #39. "Dietary Proteins"[Mesh]
- #40. FBF
- #41. "Corn soy\*"
- #42. "Wheat soy\* blend\*"
- #43. "Rice mild blend\*"
- #44. "Milk rice blend\*"
- #45. "Pea wheat blend\*"
- #46. "Cereal pulse blend\*"
- #47. "Lipid-based nutrient supplement\*"
- #48. Nutributter
- #49. "Milk Proteins"[Mesh]
- #50. "Community based management of malnutrition" OR CMAM
- #51. "Amoxicillin"[Mesh]
- #52. "Cotrimoxazole"[Mesh]
- #53. Bacteraemia\*

#54. Gentamicin

#55. "Penicillin G"[Mesh]

#56. "Chloramphenicol"[Mesh]

#57. "Ceftriaxone"[Mesh]

#58. "Ciprofloxacin"[Mesh]

#59. "Inpatient management" OR "In-patient management" OR IMCI OR IMNCI

#60. "Community based management"

#61. "Facility based management"

#62. Prophyla\* AND antibiotic\*

#63. #24 OR #25 OR #26 OR #27 OR #28 OR #29 OR #30 OR #31 OR #32 OR #33 OR #34 OR #35 OR #36 OR #37 OR #38 OR #39 OR #40 OR #41 OR #42 OR #43 OR #44 OR #45 OR #46 OR #47 OR #48 OR #49 OR #50 OR #51 OR #52 OR #53 OR #54 OR #55 OR #56 OR #57 OR #58 OR #59 OR #60 OR #61 OR #62

#64. "Morbidity"[Mesh]

#65. "Mortality"[Mesh]

#66. Death\*

#67. Relapse\*

#68. Recovery

#69. #64 OR #65 OR #66 OR #67 OR #68

#70. #8 AND #23 AND (#63 OR #69)

#71. Age Filters Applied: Infants 1-23 months; birth-23 months; Preschool child 2-5 years

## Appendix B: Reasons for exclusion for excluded studies

| Study              | Reason for Exclusion                                                                                                                                                   |
|--------------------|------------------------------------------------------------------------------------------------------------------------------------------------------------------------|
| Agha 2004 [1]      | This study did not have an appropriate control group.                                                                                                                  |
| Aguayo 2018 [2]    | The study design was not appropriate.                                                                                                                                  |
| Ahmed 1999 [3]     | The study design was not appropriate.                                                                                                                                  |
| Ashworth 2004 [4]  | The study design was not appropriate.                                                                                                                                  |
| Bachou 2008 [5]    | The study design was not appropriate.                                                                                                                                  |
| Badaloo 1999 [6]   | This study did not assess the intervention of interest; study compared high protein formula with low protein formula.                                                  |
| Baker 1978 [7]     | The study did not assess the intervention of interest; study compared milk diet with soy-maize-porridge diet.                                                          |
| Bhandari 2001 [8]  | The study did not assess the intervention of interest; study compared food supplementation with counselling with nutritional counselling alone.                        |
| Burza 2016 [9]     | The study design was not appropriate.                                                                                                                                  |
| Donnen 2007 [10]   | This study included children up to 14 years of age                                                                                                                     |
| Dubray 2008 [11]   | This study compared two different antibiotics (ceftriaxone vs amoxicillin) in children with SAM and did not have an appropriate control group (no antibiotic/placebo). |
| Javan 2017 [12]    | This study was conducted in Upper Middle Income Country.                                                                                                               |
| Linneman 2007 [13] | This study did not have an appropriate control group.                                                                                                                  |
| Nagar 2016 [14]    | This study did not have an appropriate control group.                                                                                                                  |
| Roy 2005 [15]      | The study did not assess the intervention of interest; study compared supplementary feeding with education to feeding alone.                                           |
| Simpore 2006 [16]  | This study did not have an appropriate control group.                                                                                                                  |
| Zongo 2013 [17]    | The study did not assess the intervention of interest; the study compared Moringa leaf in addition to the usual porridge diet.                                         |

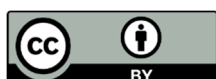

© 2019 by the authors. Submitted for possible open access publication under the terms and conditions of the Creative Commons Attribution (CC BY) license (<http://creativecommons.org/licenses/by/4.0/>).

## Appendix C: Supplementary Figures

*Comparison 1: Community based strategies to screen, identify and manage SAM and MAM compared to no community based strategies*

Figure 1: Forest plot for the impact of community based strategies compared to no community based strategies on Recovery

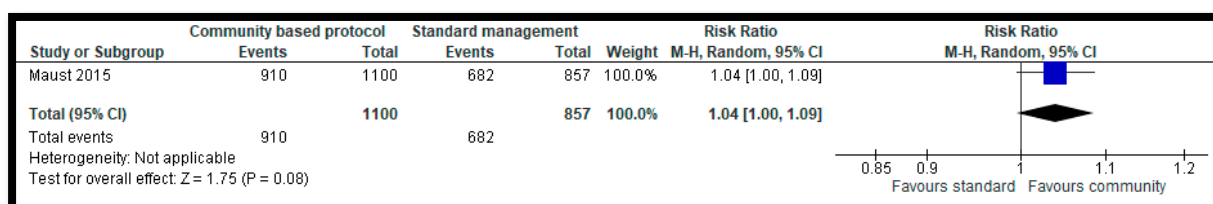

Figure 2: Forest plot for the impact of community based strategies compared to no community based strategies on Weight Gain

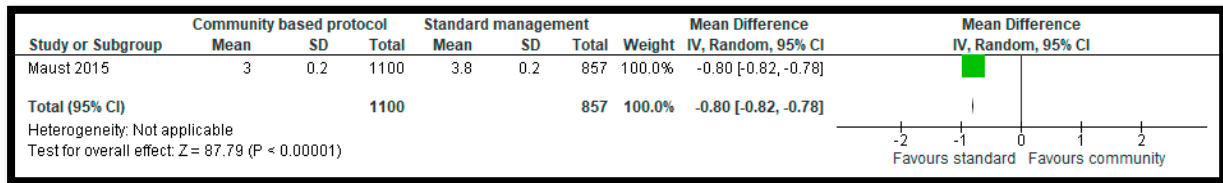

Figure 3: Forest plot for the impact of community based strategies compared to no community based strategies on Mortality

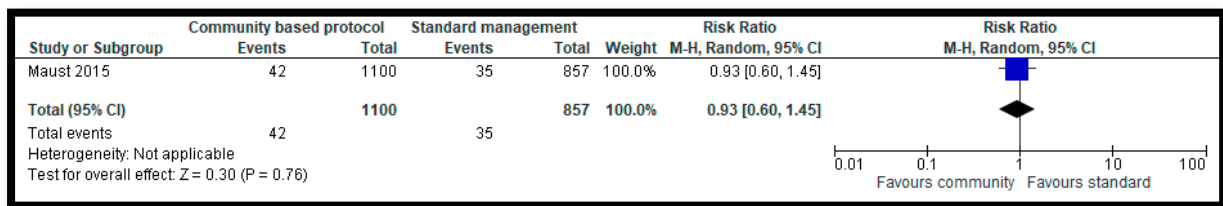

Figure 4: Forest plot for the impact of community based strategies compared to no community based strategies on Length Gain

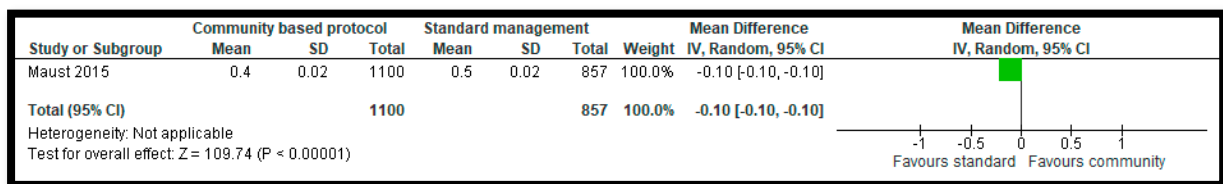

Figure 5: Forest plot for the impact of community based strategies compared to no community based strategies on MUAC Gain

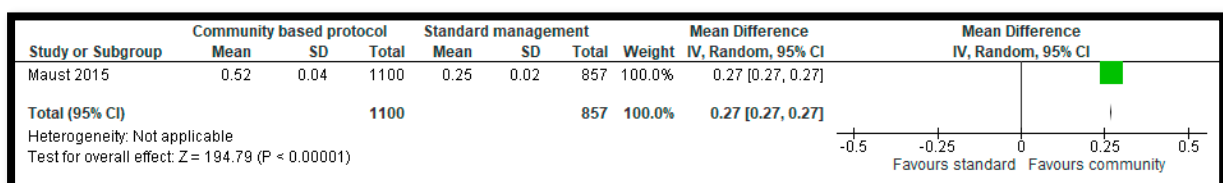

Figure 6: Forest plot for the impact of community based strategies compared to no community based strategies on Adverse Events

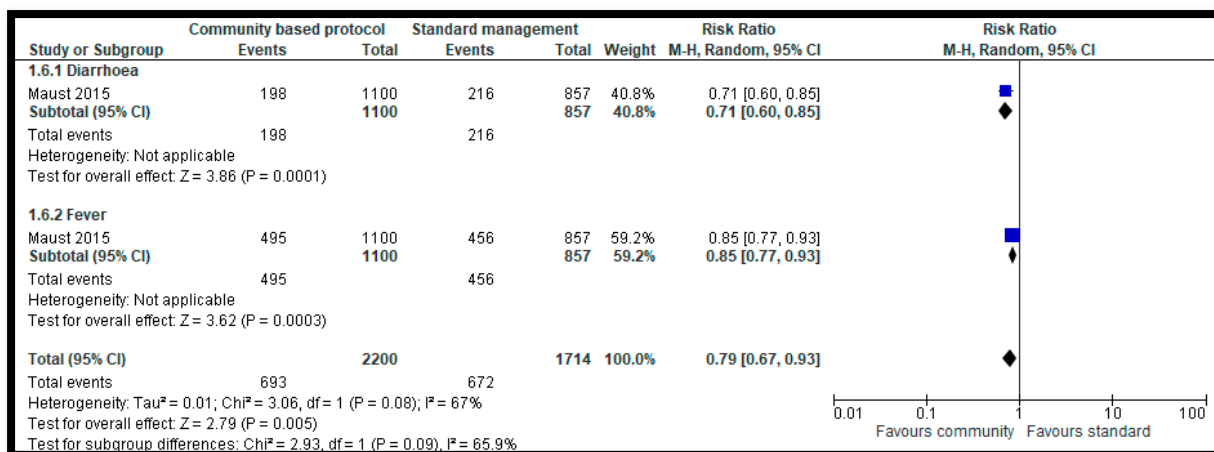

Comparison 2: Facility based strategies to screen and manage uncomplicated SAM according to the WHO protocol compared to other standards of care

Figure 7: Forest plot for the impact of facility based strategies according to WHO protocol compared to other protocols on Recovery

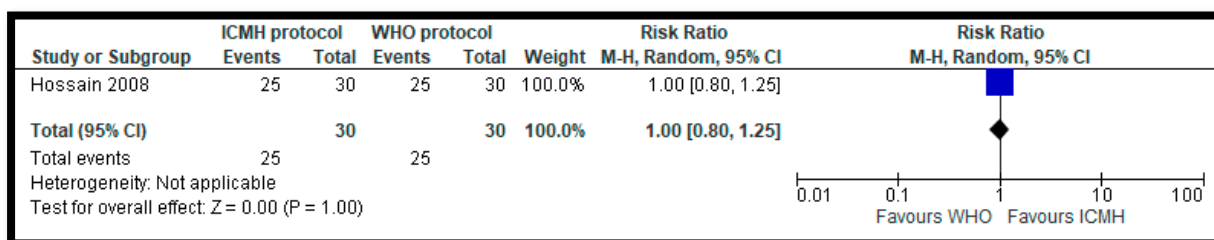

Figure 8: Forest plot for the impact of facility based strategies according to WHO protocol compared to other protocols on Mortality

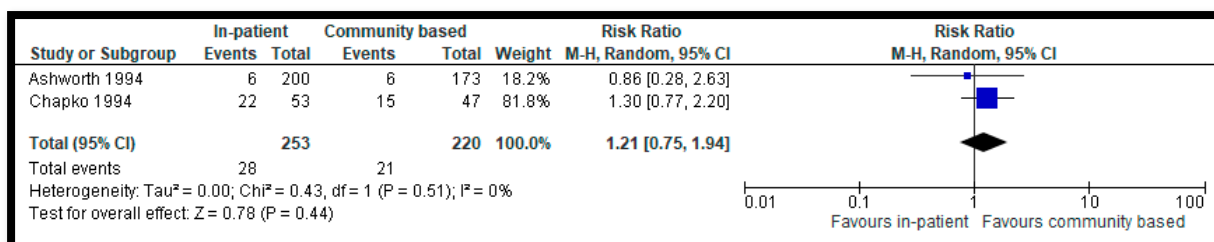

Comparison 3: Facility based strategies to screen and manage uncomplicated SAM according to the WHO protocol compared to other standards of care (In-patient treatment with RUTF compared to F100)

Figure 9: Forest plot for the impact of facility based treatment with RUTF compared to F100 on Weight Gain

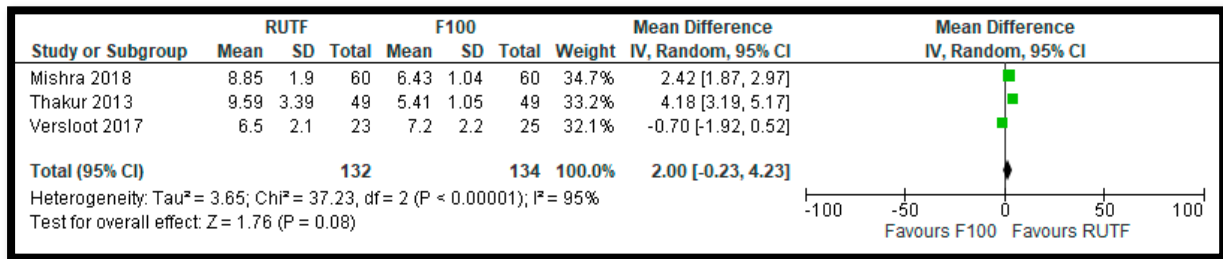

Figure 10: Forest plot for the impact of facility based treatment with RUTF compared to F100 on Mortality

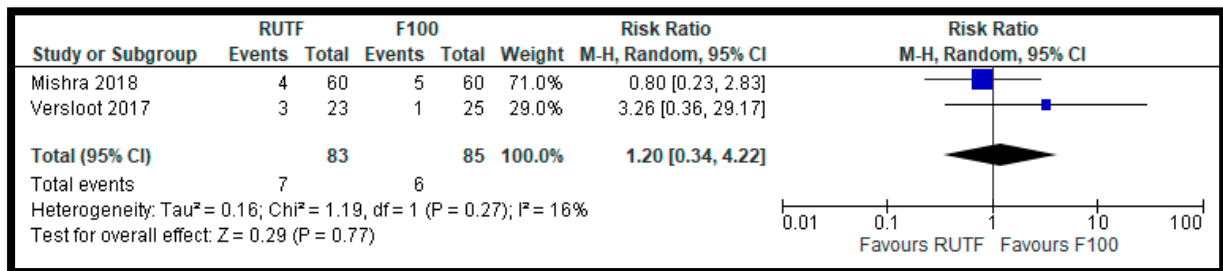

*Comparison 4: Community based management of children with uncomplicated SAM as outpatients with RUTF compared to standard diet, fortified blended flours (FBFs) or other locally produced foods*

Figure 11: Forest plot for the impact of RUTF compared to other foods on Mortality

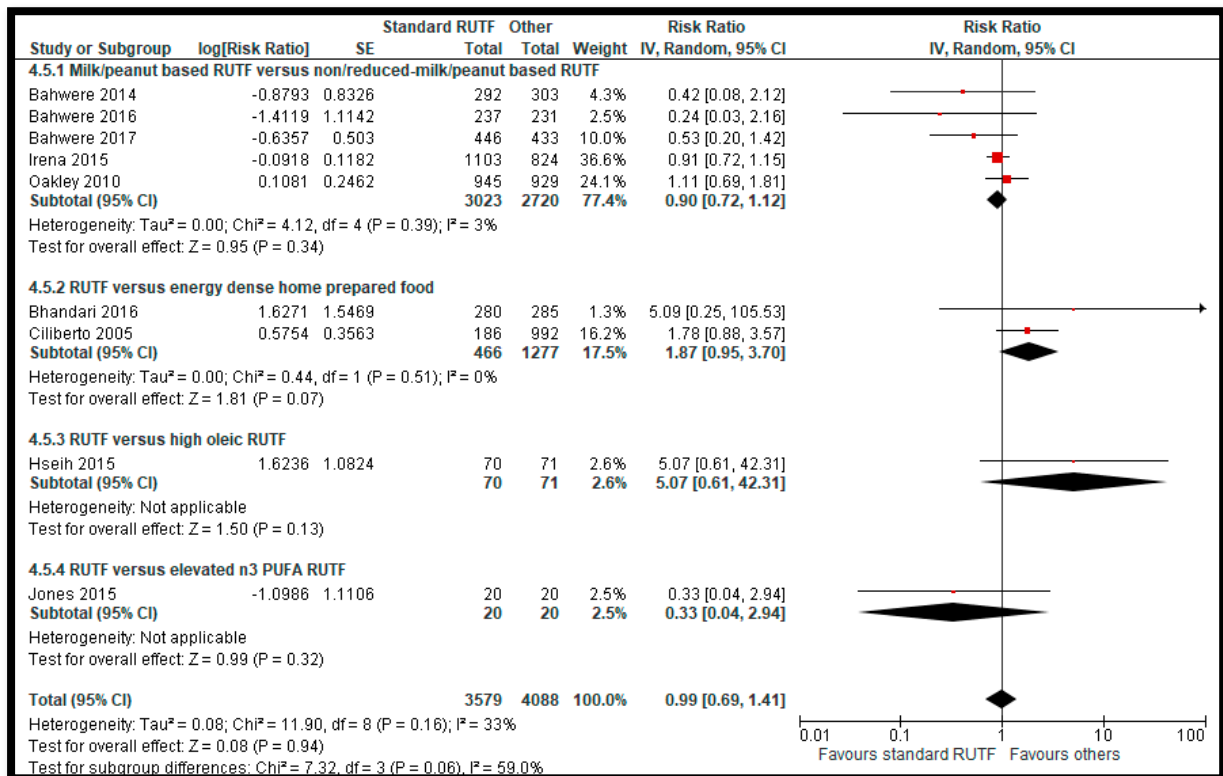

Figure 12: Forest plot for the impact of RUTF compared to other foods on Height/Length Gain

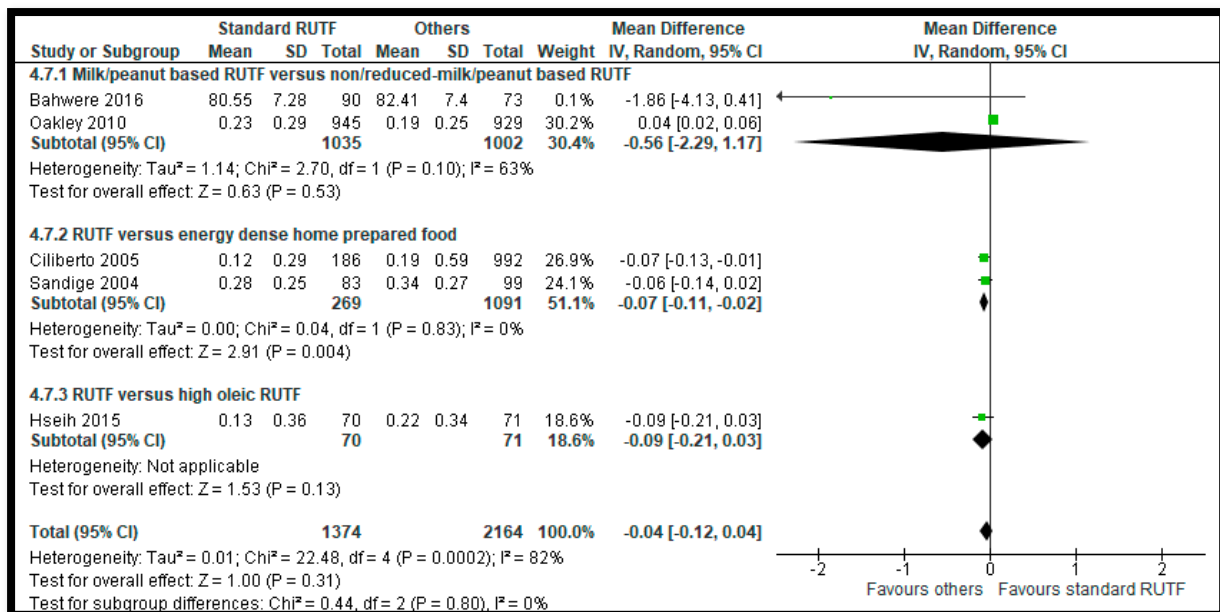

Figure 13: Forest plot for the impact of RUTF compared to other foods on MUAC Gain

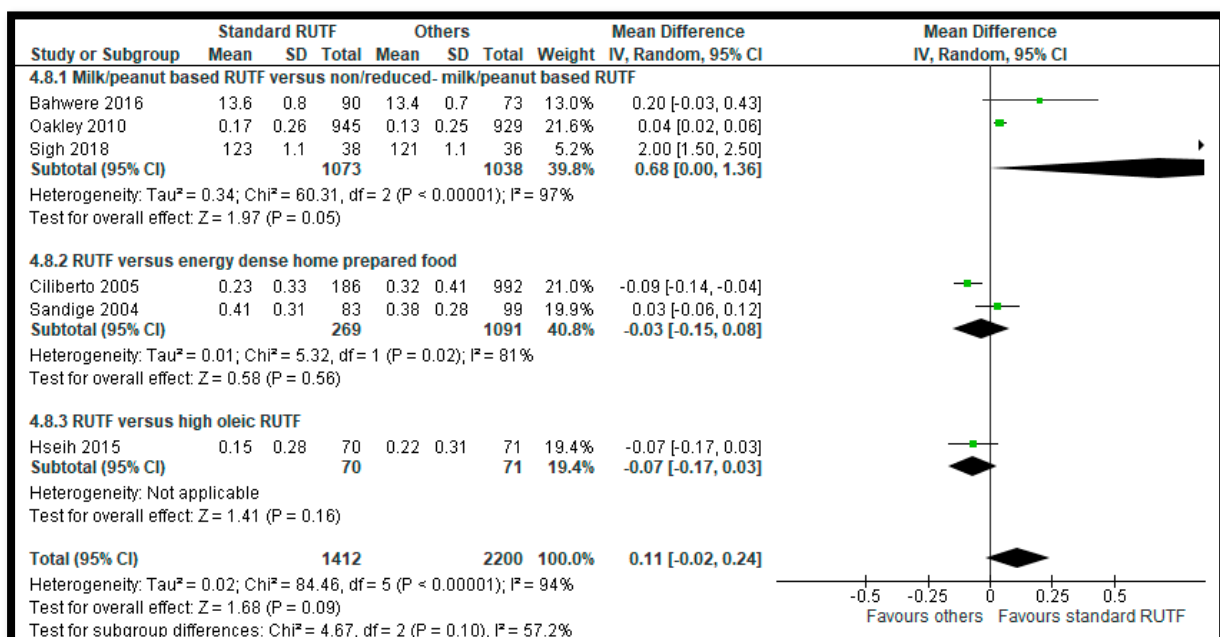

Figure 14: Forest plot for the impact of RUTF compared to other foods on Time to Recovery



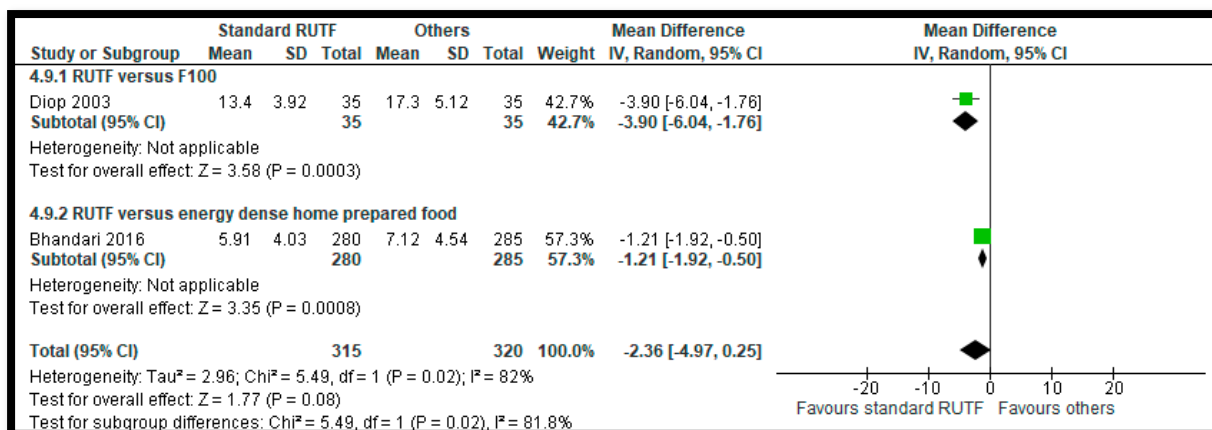

Figure 15: Forest plot for the impact of RUTF compared to other foods on Adverse Events

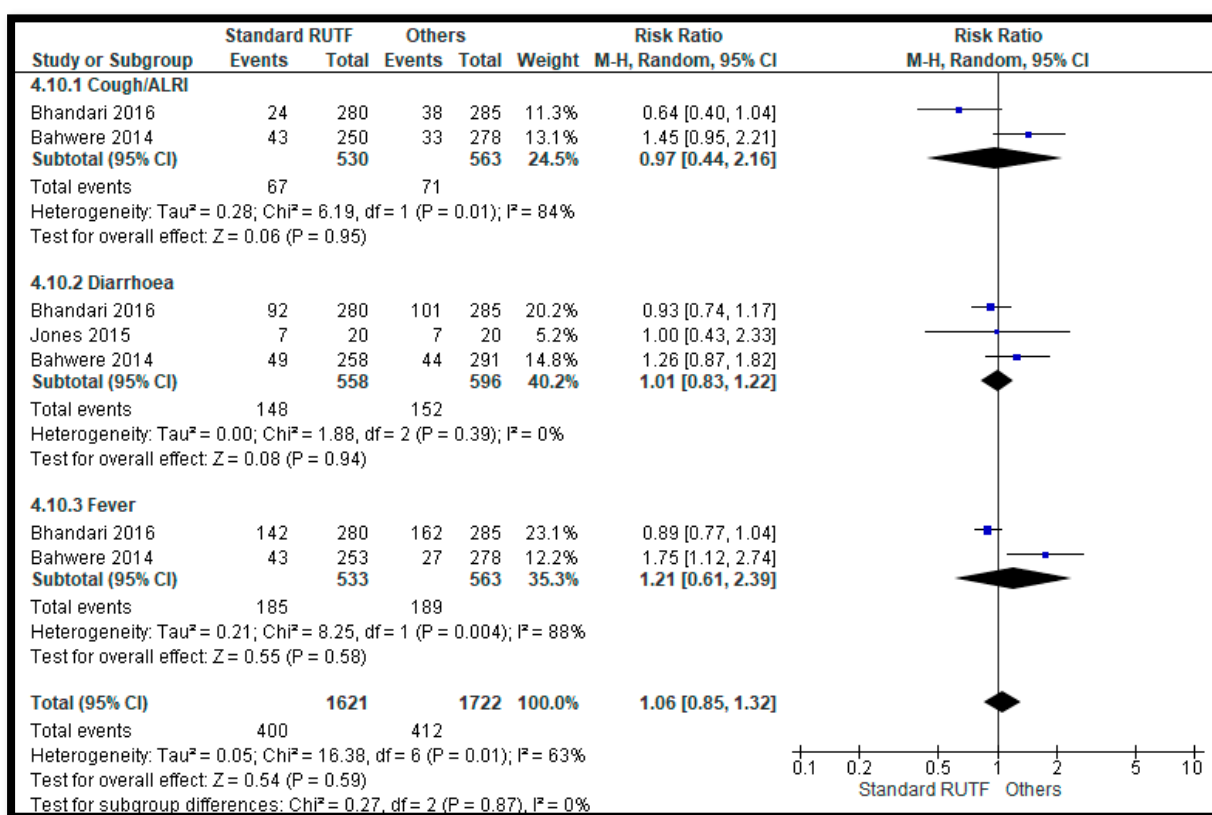

Figure 16: Forest plot for the impact of RUTF compared to other foods on Hospitalisation

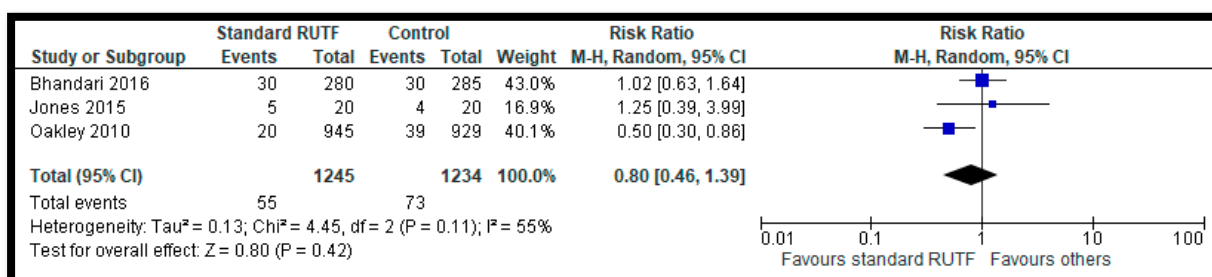

Comparison 5: RUSF for MAM compared to standard diet, or FBF or other locally produced foods

Figure 17: Forest plot for the impact of RUSF for MAM compared to other foods on Recovery

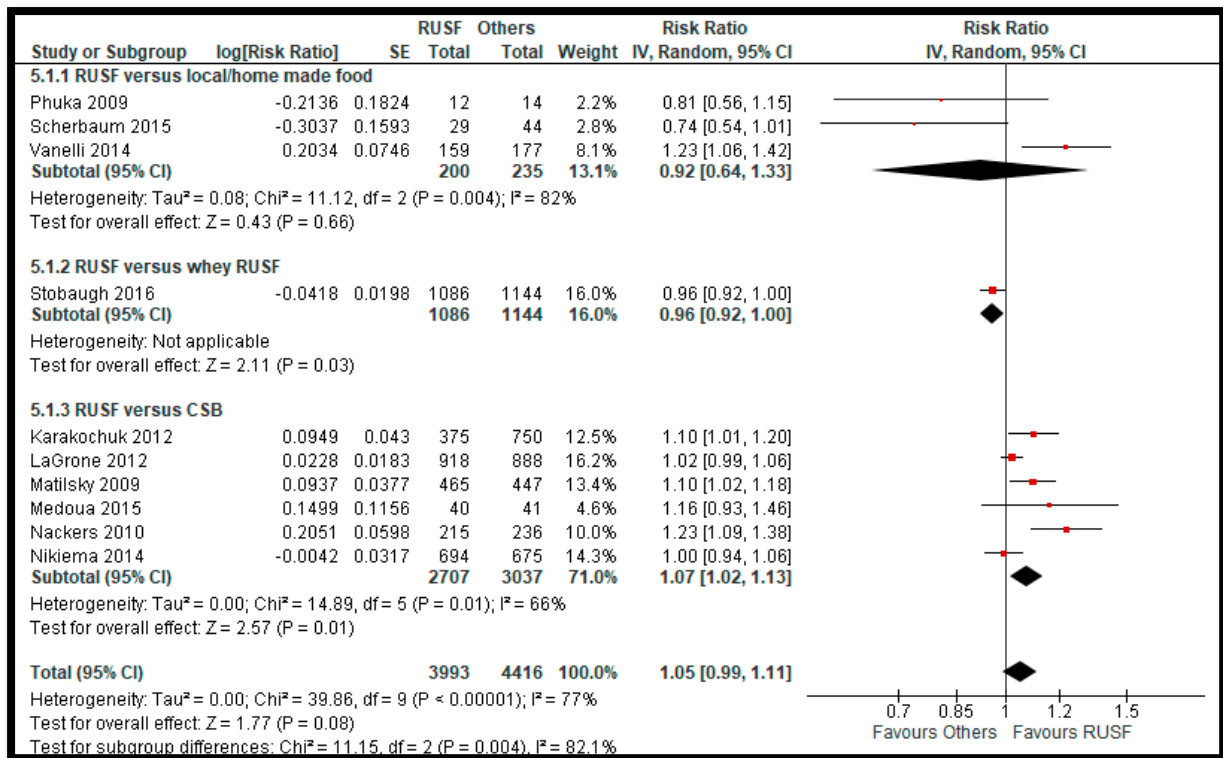

Figure 18: Forest plot for the impact of RUSF for MAM compared to other foods on Weight Gain

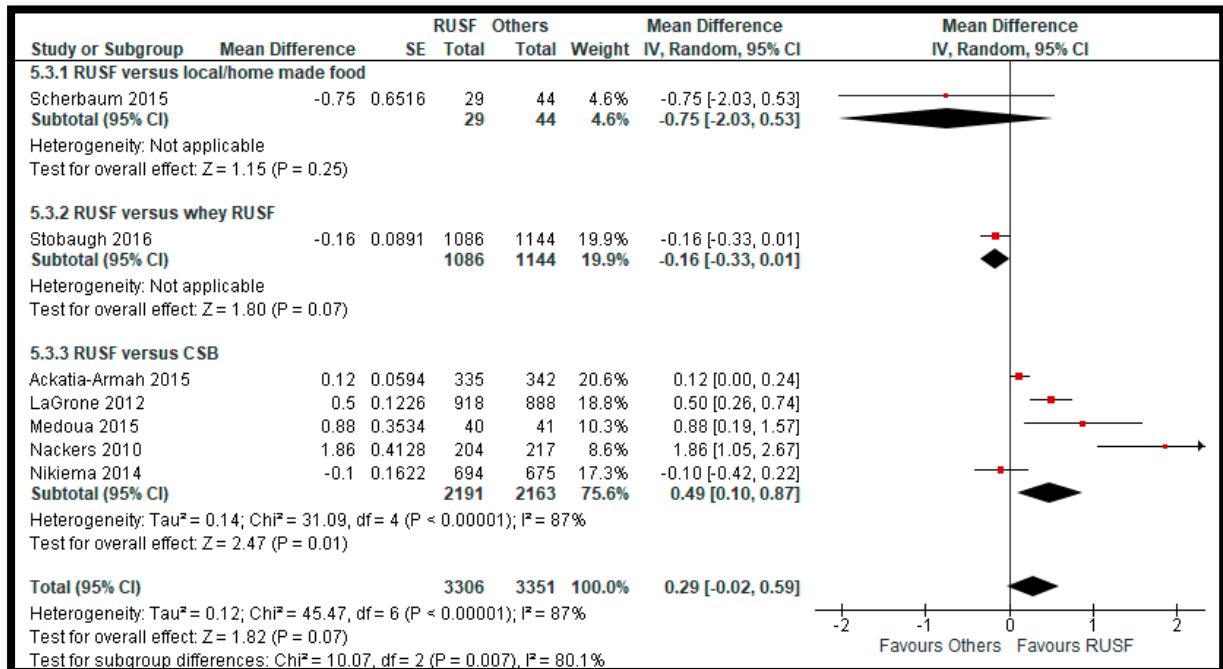

Figure 19: Forest plot for the impact of RUSF for MAM compared to other foods on Mortality

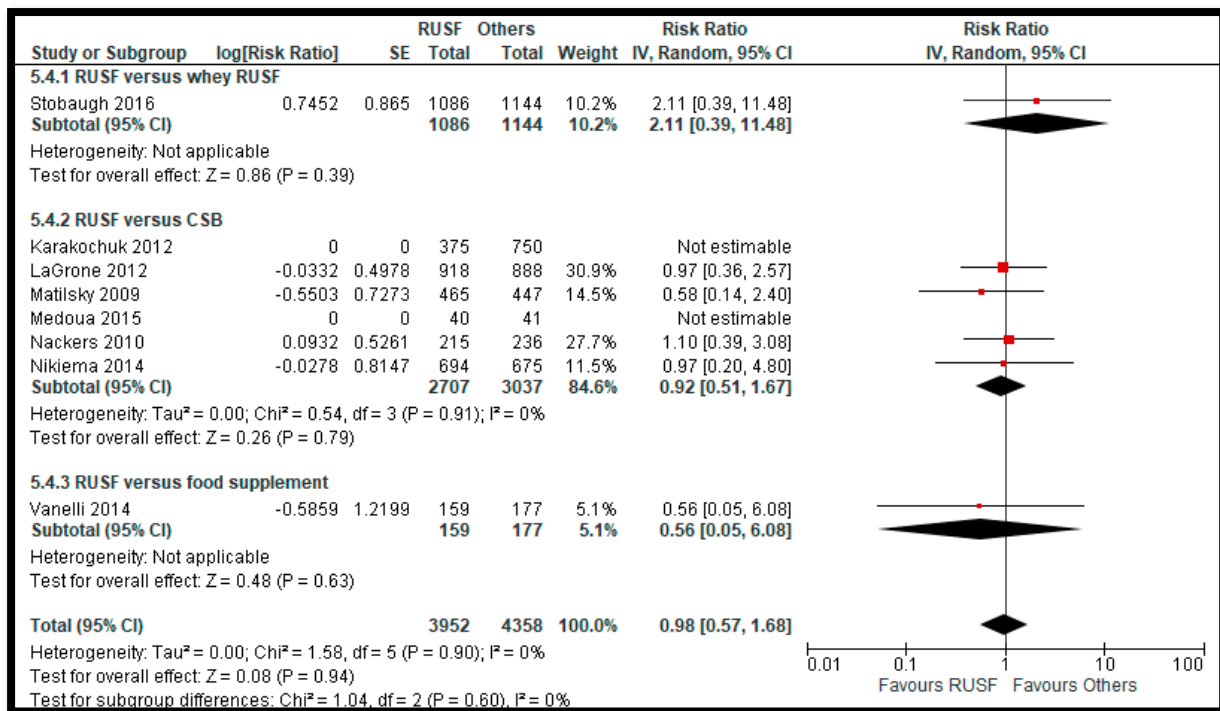

Figure 20: Forest plot for the impact of RUSF for MAM compared to other foods on Length/Height Gain

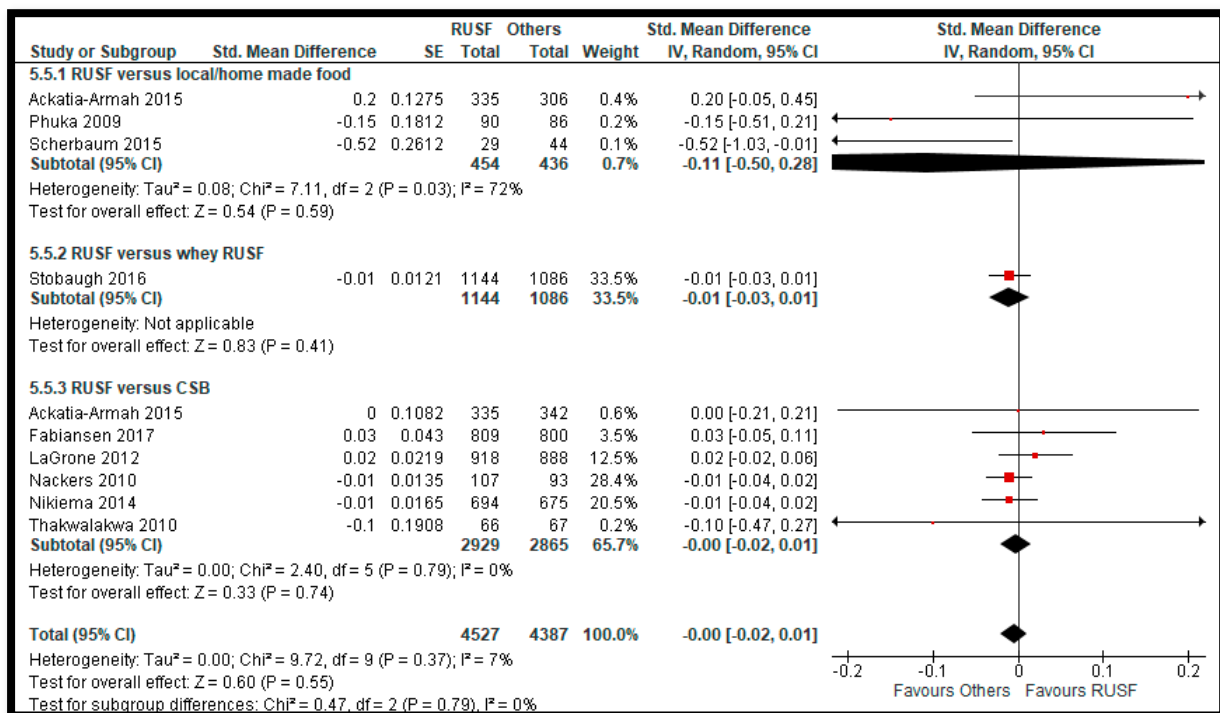

Figure 21: Forest plot for the impact of RUSF for MAM compared to other foods on MUAC

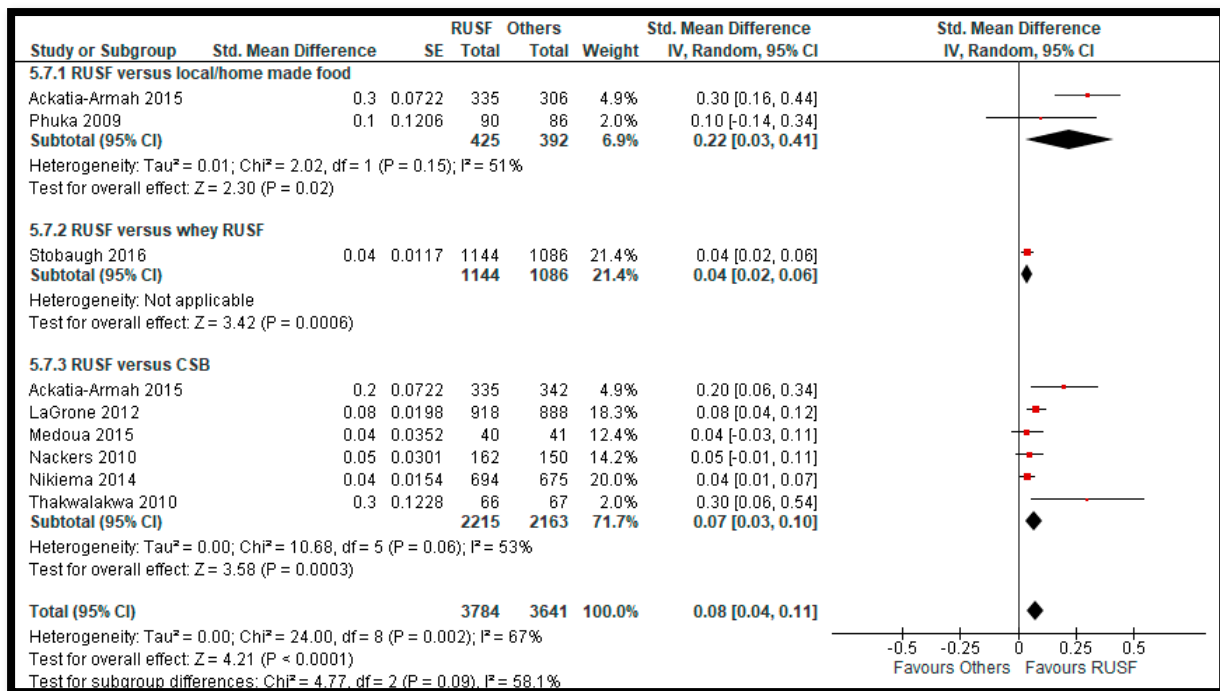

Figure 22: Forest plot for the impact of RUSF for MAM compared to other foods on Time to Recovery

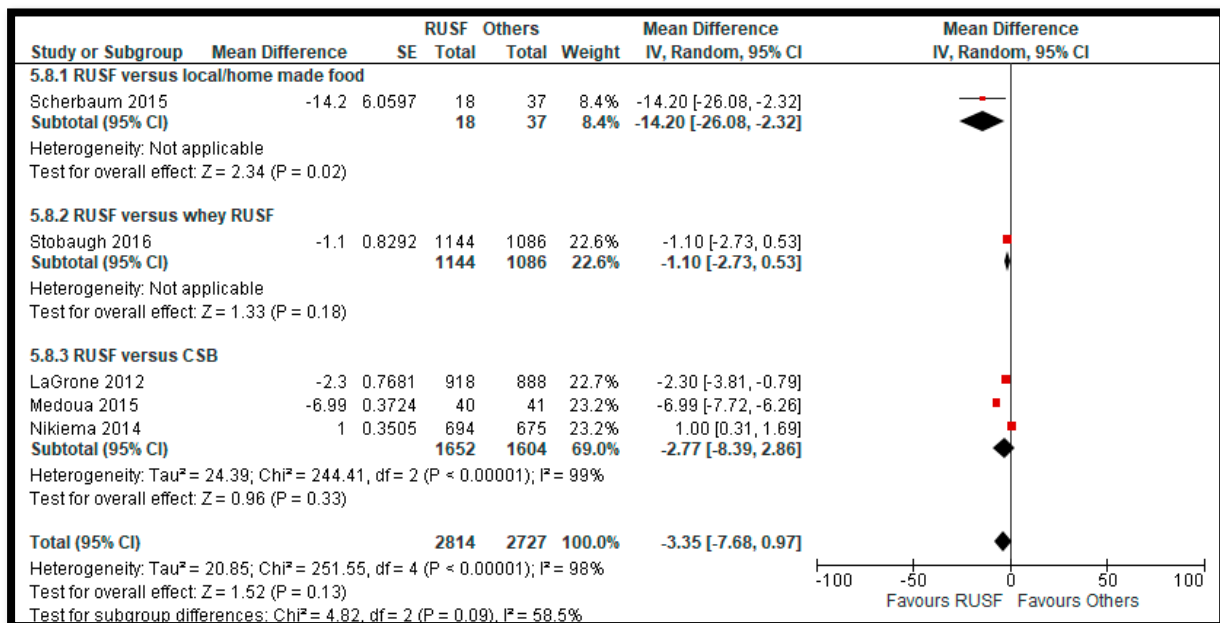

Figure 23: Forest plot for the impact of RUSF for MAM compared to other foods on Moderate Stunting

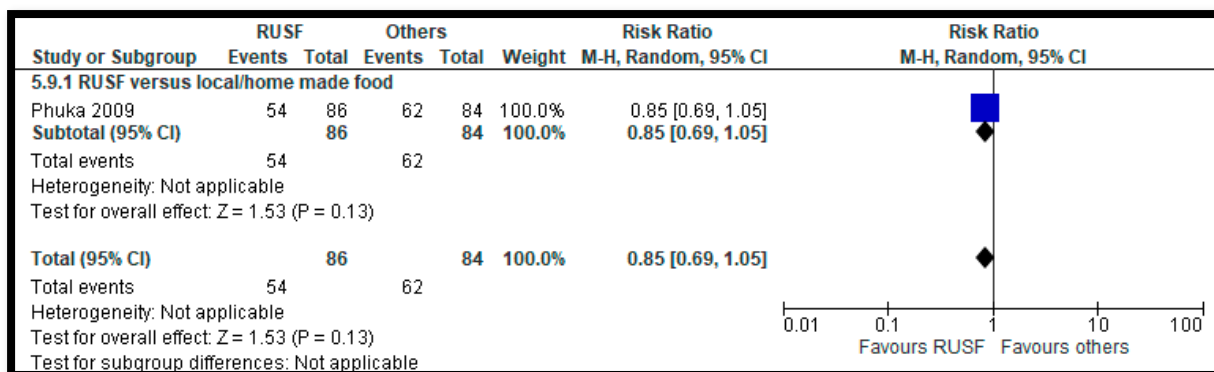

Figure 24: Forest plot for the impact of RUSF for MAM compared to other foods on Moderate Wasting

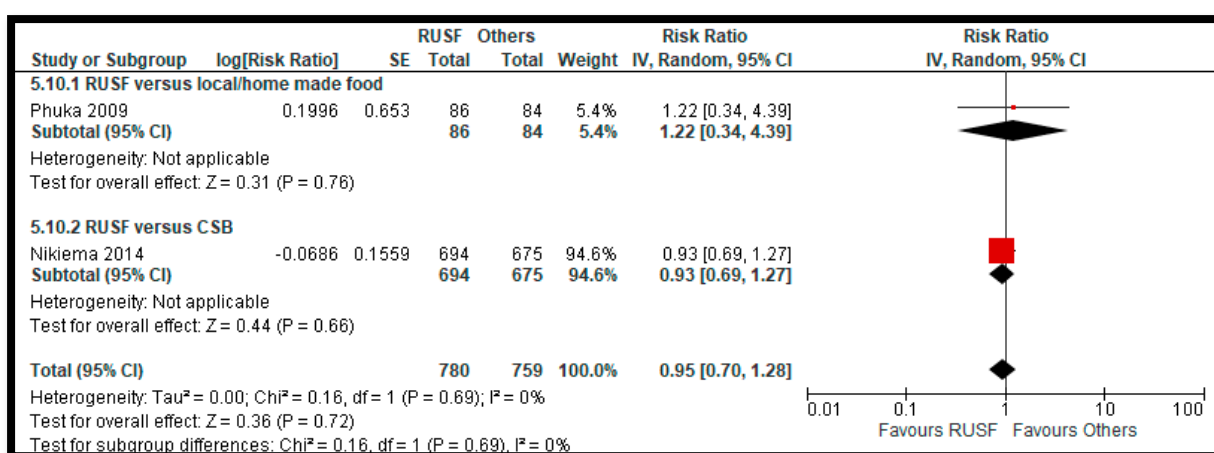

Figure 25: Forest plot for the impact of RUSF for MAM compared to other foods on Severe Wasting

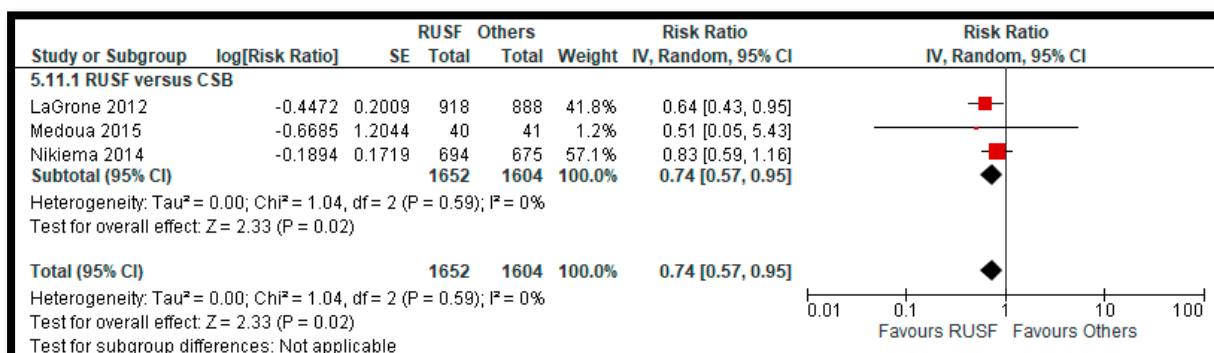

Figure 26: Forest plot for the impact of RUSF for MAM compared to other foods on Moderate Underweight

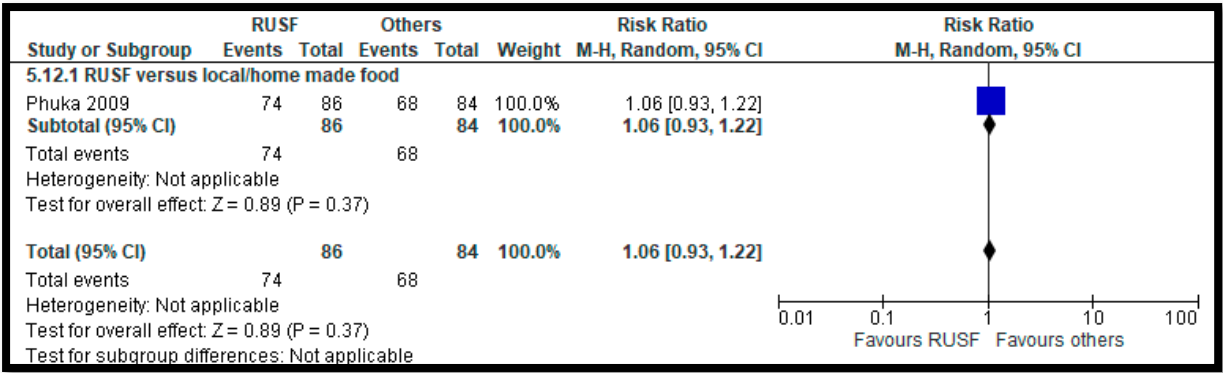

Figure 27: Forest plot for the impact of RUSF for MAM compared to other foods on Adverse Events

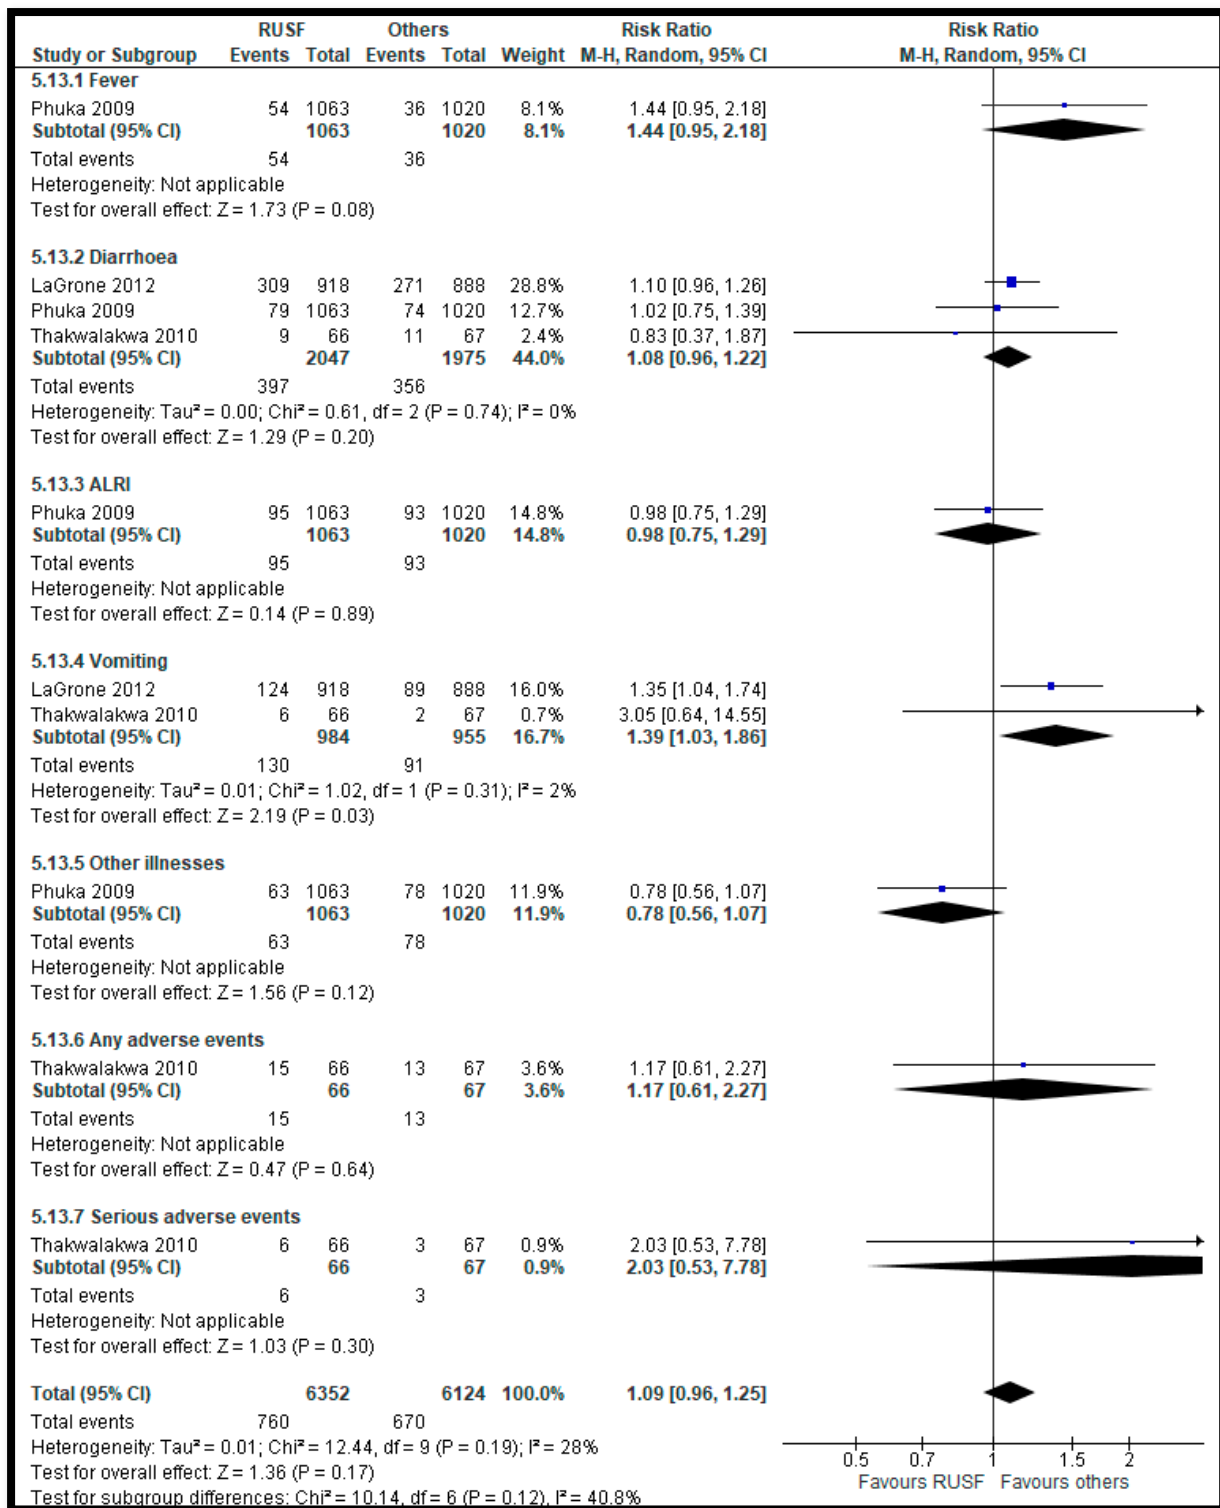

Figure 28: Forest plot for the impact of RUSF for MAM compared to other foods on Hospitalisation

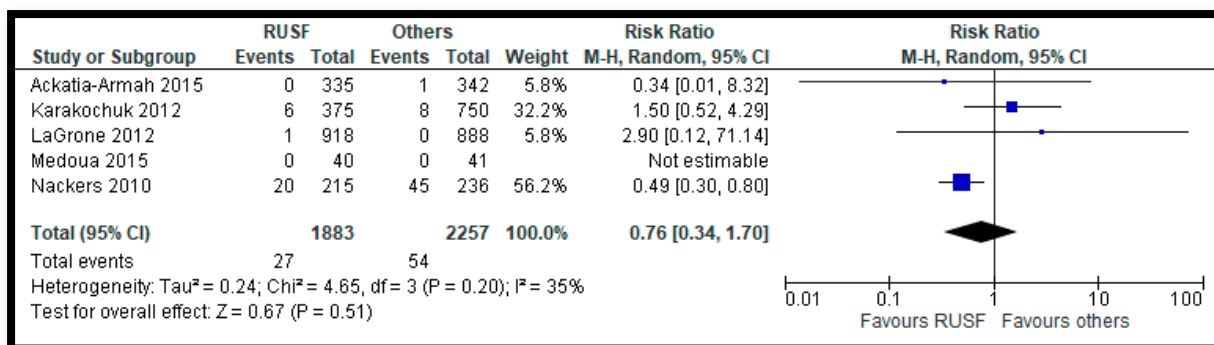

Comparison 6: Prophylactic use of antibiotics in children with uncomplicated SAM compared to no antibiotics

Figure 29: Forest plot for the impact of prophylactic antibiotic compared to no antibiotic on Weight Gain

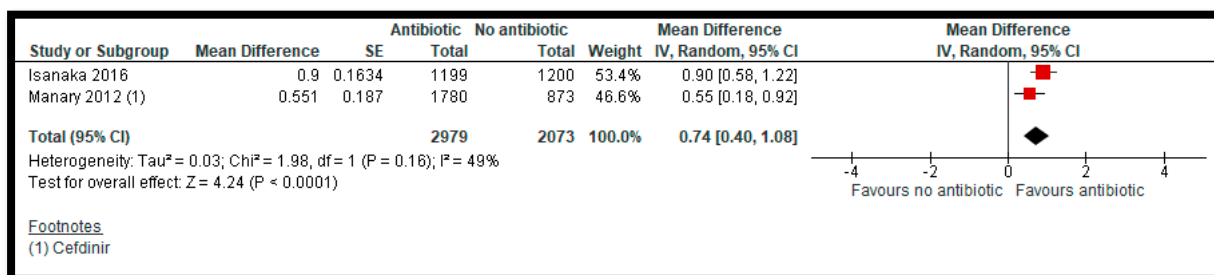

Figure 30: Forest plot for the impact of prophylactic antibiotic compared to no antibiotic on MUAC Gain

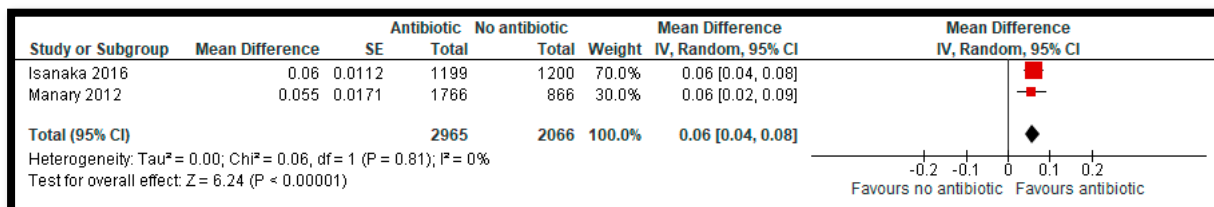

Figure 31: Forest plot for the impact of prophylactic antibiotic compared to no antibiotic on Length Gain

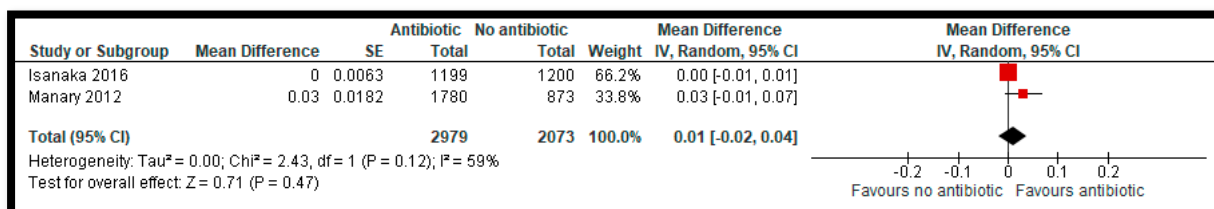

Figure 32: Forest plot for the impact of prophylactic antibiotic compared to no antibiotic on Time to Recovery



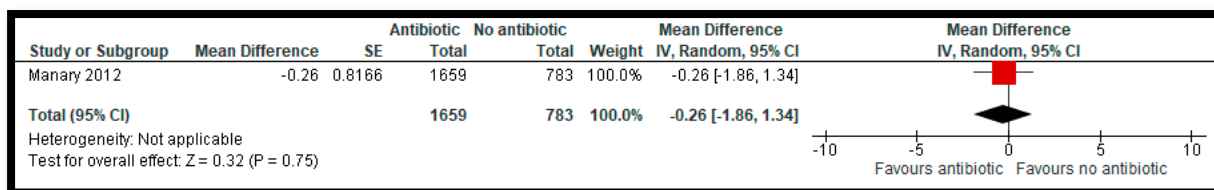

Figure 33: Forest plot for the impact of prophylactic antibiotic compared to no antibiotic on Adverse Events

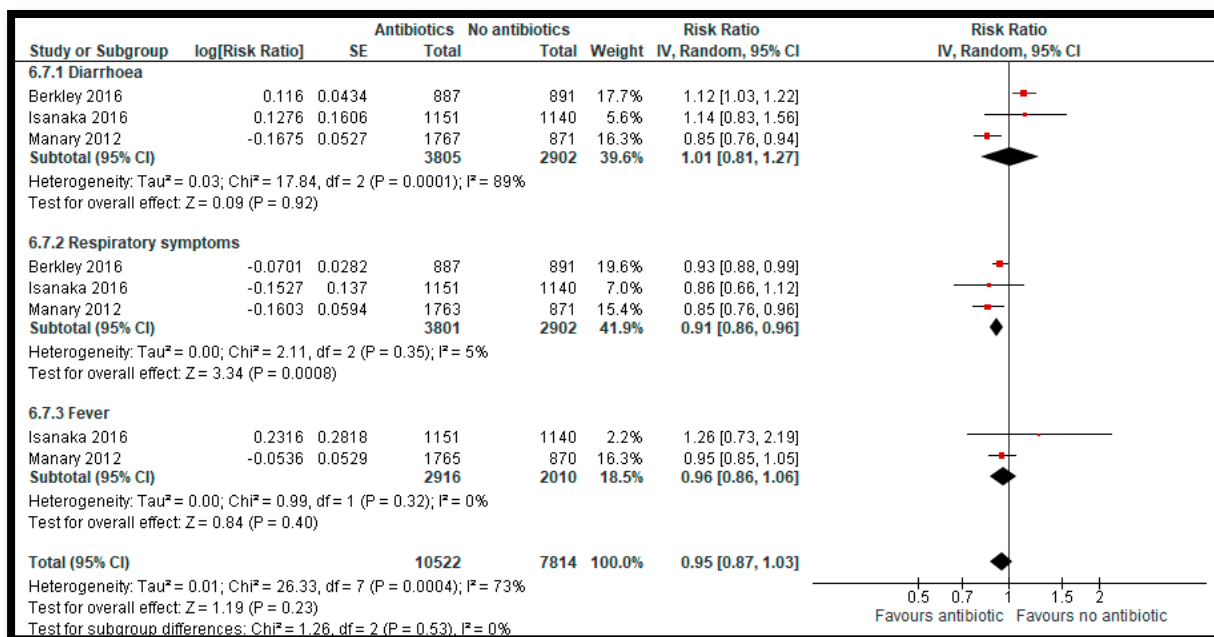

Figure 34: Forest plot for the impact of prophylactic antibiotic compared to no antibiotic on Hospitalisation

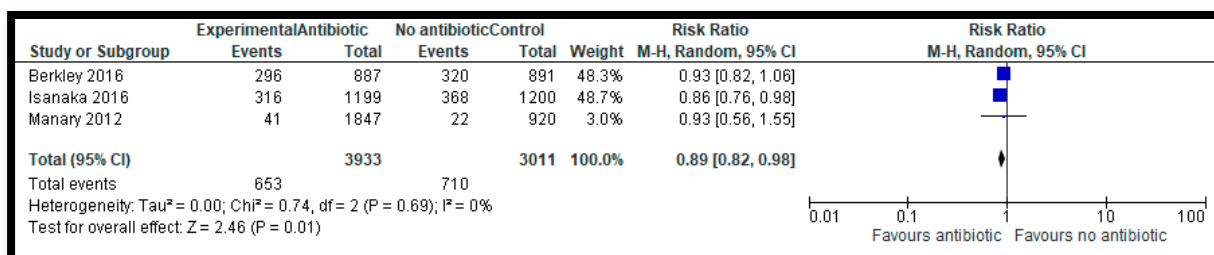

Comparison 7: Vitamin A supplementation in the management of SAM and MAM with various doses and frequency of administration

Figure 35: Forest plot for the impact of vitamin A supplementation on Weight Change

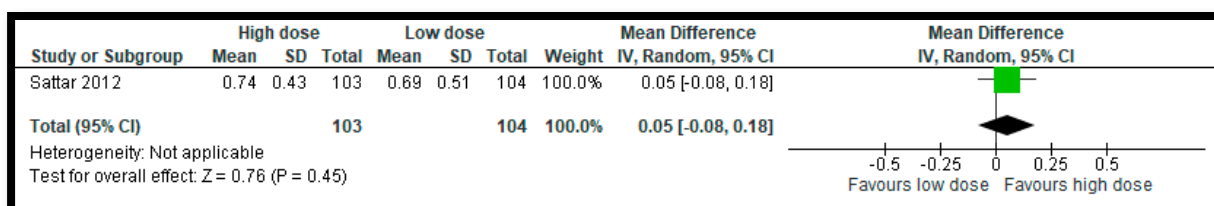

Figure 36: Forest plot for the impact of vitamin A supplementation on Mortality

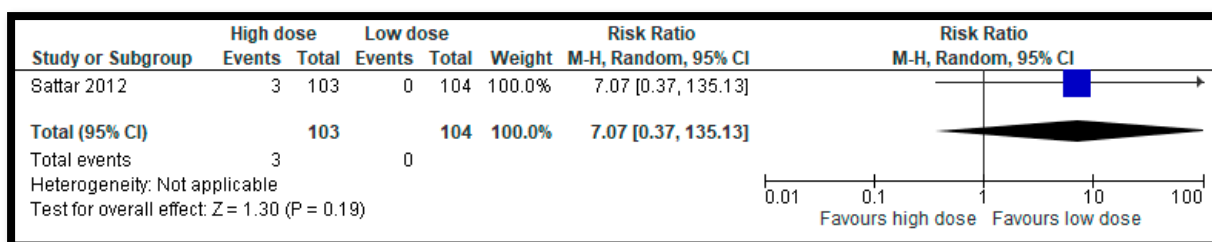

Figure 37: Forest plot for the impact of vitamin A supplementation on Height Change

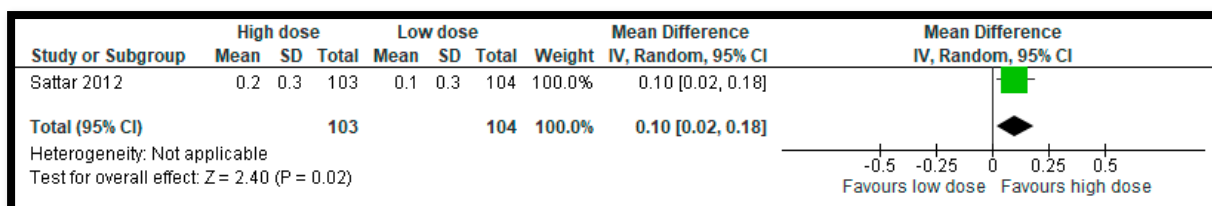

Figure 38: Forest plot for the impact of vitamin A supplementation on MUAC Change

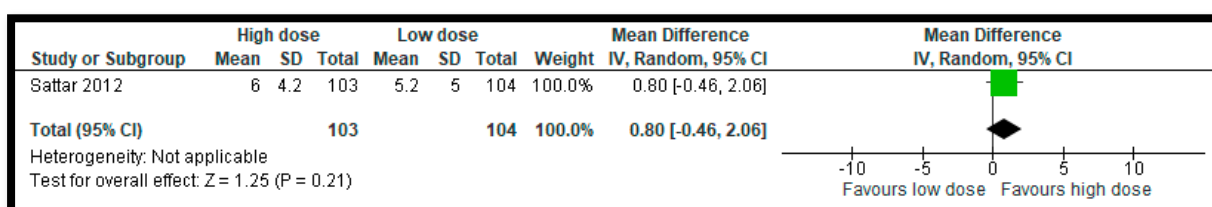

Figure 39: Forest plot for the impact of vitamin A supplementation on Adverse Events

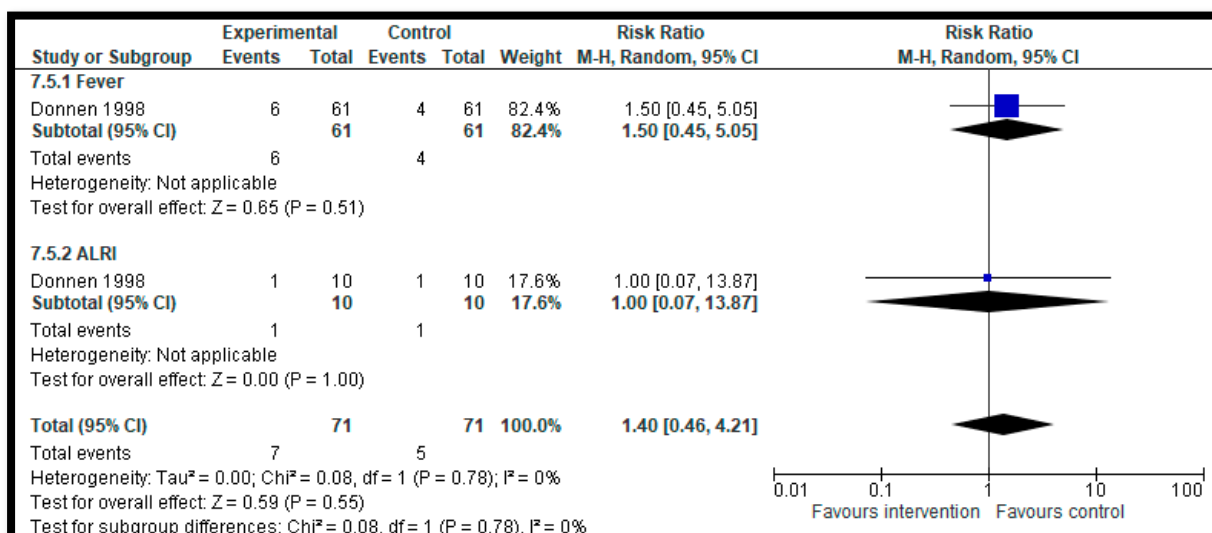

1. Agha, S., *Supplementary feeding of malnourished children in northern Iraq*. 2004.

2. Aguayo, V.M., et al., *Community management of acute malnutrition (CMAM) programme in Pakistan effectively treats children with uncomplicated severe wasting*. Maternal & child nutrition, 2018. **14**: p. e12623.
3. Ahmed, T., et al., *Mortality in severely malnourished children with diarrhoea and use of a standardised management protocol*. The Lancet, 1999. **353**(9168): p. 1919-1922.
4. Ashworth, A., et al., *WHO guidelines for management of severe malnutrition in rural South African hospitals: effect on case fatality and the influence of operational factors*. The Lancet, 2004. **363**(9415): p. 1110-1115.
5. Bachou, H., et al., *Reduction of unnecessary transfusion and intravenous fluids in severely malnourished children is not enough to reduce mortality*. Annals of tropical paediatrics, 2008. **28**(1): p. 23-33.
6. Badaloo, A., et al., *Dietary protein, growth and urea kinetics in severely malnourished children and during recovery*. The Journal of nutrition, 1999. **129**(5): p. 969-979.
7. Baker, R., et al., *Successful use of a soya-maize mixture in the treatment of kwashiorkor*. S Afr Med J, 1978. **53**(17): p. 674-677.
8. Bhandari, N., et al., *Food supplementation with encouragement to feed it to infants from 4 to 12 months of age has a small impact on weight gain*. The Journal of nutrition, 2001. **131**(7): p. 1946-1951.
9. Burza, S., et al., *Seasonal effect and long-term nutritional status following exit from a community-based management of severe acute malnutrition program in Bihar, India*. European journal of clinical nutrition, 2016. **70**(4): p. 437.
10. Donnen, P., et al., *Effect of daily low dose of vitamin A compared with single high dose on morbidity and mortality of hospitalized mainly malnourished children in senegal: a randomized controlled clinical trial*. European journal of clinical nutrition, 2007. **61**(12): p. 1393.
11. Dubray, C., et al., *Treatment of severe malnutrition with 2-day intramuscular ceftriaxone vs 5-day amoxicillin*. Annals of tropical paediatrics, 2008. **28**(1): p. 13-22.
12. Javan, R., et al., *Effectiveness of supplementary blended flour based on chickpea and cereals for the treatment of infants with moderate acute malnutrition in Iran: A randomized clinical trial*. Electronic physician, 2017. **9**(12): p. 6078.
13. Linneman, Z., et al., *A large-scale operational study of home-based therapy with ready-to-use therapeutic food in childhood malnutrition in Malawi*. Maternal & child nutrition, 2007. **3**(3): p. 206-215.
14. Nagar, R.P., T. Nagar, and B.D. Gupta, *Treatment outcome in patients with severe acute malnutrition managed with protocolised care at malnutrition treatment corner in Rajasthan, India: a prospective observational study (quasi-experimental)*. Int J Res Med Sci, 2016. **4**(1): p. 238-45.
15. Roy, S.K., et al., *Intensive nutrition education with or without supplementary feeding improves the nutritional status of moderately-malnourished children in Bangladesh*. Journal of Health, Population and Nutrition, 2005: p. 320-330.
16. Simpore, J., et al., *Nutrition rehabilitation of undernourished children utilizing Spiruline and Misola*. Nutrition journal, 2006. **5**(1): p. 3.
17. Zongo, U., et al., *Nutritional and clinical rehabilitation of severely malnourished children with Moringa oleifera Lam. leaf powder in Ouagadougou (Burkina Faso)*. Food and nutrition sciences, 2013. **4**(09): p. 991.
